# 1 Variation in upstream open reading frames contributes to 2 allelic diversity in protein abundance

3 Joseph L. Gage<sup>a,\*</sup>, Sujina Mali<sup>b</sup>, Fionn McLoughlin<sup>b</sup>, Merritt Khaipho-Burch<sup>c</sup>, Brandon Monier<sup>a</sup>, Julia  
4 Bailey-Serres<sup>d</sup>, Richard D. Vierstra<sup>b</sup>, and Edward S. Buckler<sup>a,c,e</sup>

5 <sup>a</sup>Institute for Genomic Diversity, Cornell University, Ithaca, NY, USA 14853

6 <sup>b</sup>Department of Biology, Washington University in St. Louis, St. Louis, MO, USA 63130

7 <sup>c</sup>Plant Breeding and Genetics Section, School of Integrative Plant Science, Cornell University, Ithaca,  
8 NY 14853, USA

9 <sup>d</sup>Department of Botany and Plant Sciences, Center for Plant Cell Biology, University of California  
10 Riverside, Riverside, CA, USA 92521

11 <sup>e</sup>USDA-ARS, Ithaca, NY, USA 14853

12 \* Corresponding author: [jlg374@cornell.edu](mailto:jlg374@cornell.edu)

### 13 **Abstract**

14 The 5' untranslated region (UTR) sequence of eukaryotic mRNAs may contain upstream open reading  
15 frames (uORFs), which can regulate translation of the main open reading frame (mORF). The current  
16 model of translational regulation by uORFs posits that when a ribosome scans an mRNA and encounters  
17 a uORF, translation of that uORF can prevent ribosomes from reaching the mORF and cause decreased  
18 mORF translation. In this study, we first observed that rare variants in the 5' UTR dysregulate protein  
19 abundance. Upon further investigation, we found that rare variants near the start codon of uORFs can  
20 repress or derepress mORF translation, causing allelic changes in protein abundance. This finding holds  
21 for common variants as well, and common variants that modify uORF start codons also contribute  
22 disproportionately to metabolic and whole-plant phenotypes, suggesting that translational regulation by  
23 uORFs serves an adaptive function. These results provide evidence for the mechanisms by which natural  
24 sequence variation modulates gene expression, and ultimately, phenotype.

### 25 **Results**

26 Understanding the mechanisms by which genetic variation produces phenotype will depend on learning  
27 how gene expression is regulated differently between alleles. Although moderate correlations between  
28 mRNA and protein have been observed across genes ( $r = 0.3-0.8$ ; reviewed in<sup>1</sup>), the correlation across  
29 individuals tends to be quite low ( $r < 0.25$ )<sup>2,3</sup>. Additionally, there is only modest overlap between variants  
30 associated with mRNA levels and variants associated with protein levels<sup>2,4-6</sup>. Together, these findings  
31 suggest an extensive role of post-transcriptional regulation in determining gene expression. Protein  
32 synthesis is energetically expensive, which implies high selective pressure on individuals to produce the  
33 appropriate quantity of each protein<sup>7,8</sup>. Despite this strong selective pressure, protein levels are heritable  
34 and vary between individuals<sup>5,9</sup>, which means that there must be adaptive advantages to allelic  
35 differences in protein abundance. Motivated by these observations, an outstanding question is: how does  
36 genetic variation contribute to variation in protein abundance?

37 We answer this question with maize (*Zea mays* L.), which has large homogeneous tissues that facilitate  
38 high quality proteome extraction; extremely high levels of phenotypic and genetic diversity<sup>10,11</sup>; and  
39 rapid linkage disequilibrium decay that allows high genetic resolution with fewer individuals<sup>12,13</sup>. We use  
40 two distinct sets of diverse inbred maize lines: a technically and biologically replicated set of four  
41 inbreds, and a mostly unreplicated set of 95 inbreds previously described<sup>2</sup>. We first use rare alleles,  
42 which generally have larger and more disruptive effects, to learn that variants in the 5' UTR, specifically  
43 those which modify uORFs, have the most influence on protein abundance. We then use those findings  
44 to identify and test common variants which likely have weaker but adaptive effects, and demonstrate  
45 their effects on protein abundance as well their contribution to metabolic and whole-plant phenotypes.

46 Regulation of gene expression is largely genetically determined; mRNA abundance is heritable in  
47 organisms across kingdoms<sup>14</sup>, as are proteomic<sup>5,9</sup> and metabolite levels<sup>15</sup>. Quantification of 7,524  
48 peptides in a pair of leaves in developmentally matched juvenile plants (four replicated maize inbreds;  
49 Supplemental Data 1) confirmed that protein abundance is heritable in maize, with median heritability of  
50 0.79, similar to mRNA and metabolite abundances<sup>15</sup> (Supplemental Figure 1). These high heritabilities  
51 not only demonstrate low measurement error, but also reveal extant adaptive genetic variation in protein  
52 abundances.

53 Previous studies of genetic variability for protein abundance between individuals<sup>2,4,6,16,17</sup> have primarily  
54 used genomewide association studies (GWAS), an approach that is most effective for alleles that are at  
55 high frequency in the population being studied. To be sufficiently powerful, GWAS require large  
56 population sizes and are still generally best suited to identifying common alleles, which tend to have  
57 smaller effect sizes but can be important for locally adapted phenotypes. In contrast, rare variants tend to  
58 have larger, deleterious effects<sup>18–20</sup> but are difficult to identify by GWAS. Because rare alleles 1) are  
59 more likely to have large effects, and 2) have been implicated in dysregulation of mRNA abundance<sup>21,22</sup>,  
60 we reasoned that in aggregate, rare alleles would be ideal candidates for identifying specific sets of  
61 variants that contribute most to post-transcriptional regulation. Our findings for rare alleles could then  
62 be validated in the pool of common alleles.

63 We identified rare variants based on a minor allele frequency (MAF) < 0.02 in the maize HapMap3.2.1  
64 population, which contains >1,200 varieties of maize and its wild relatives from around the world<sup>23</sup>.  
65 Rare variants were classified based on their location within five genic features: promoter, 5' UTR,  
66 coding sequence (CDS), intron, or 3' UTR (Figure 1b). In each genic feature, we tested for differing  
67 protein abundance among 95 diverse inbred lines (Supplemental Data 2), classified at each SNP by  
68 whether they have the common or rare allele. Introns act as in control, as they should be unable to exert  
69 post-transcriptional regulation due to their typical absence from the mRNA; we observe a corresponding  
70 lack of association between intronic rare alleles and protein abundance (Figure 1a). Rare alleles in the  
71 promoter and 5' UTR were associated with more variable protein abundance, with rare alleles in the 5'  
72 UTR showing the strongest effect (Figure 1a,c, Supplemental Figure 2). This finding reinforces previous  
73 implication of the 5' UTR in post-transcriptional regulation<sup>24–28</sup>, and the lack of any significant effect  
74 from variants in the 3' UTR contrasts with recent work focused on the role of the 3' UTR in  
75 translational regulation in maize<sup>29</sup>.

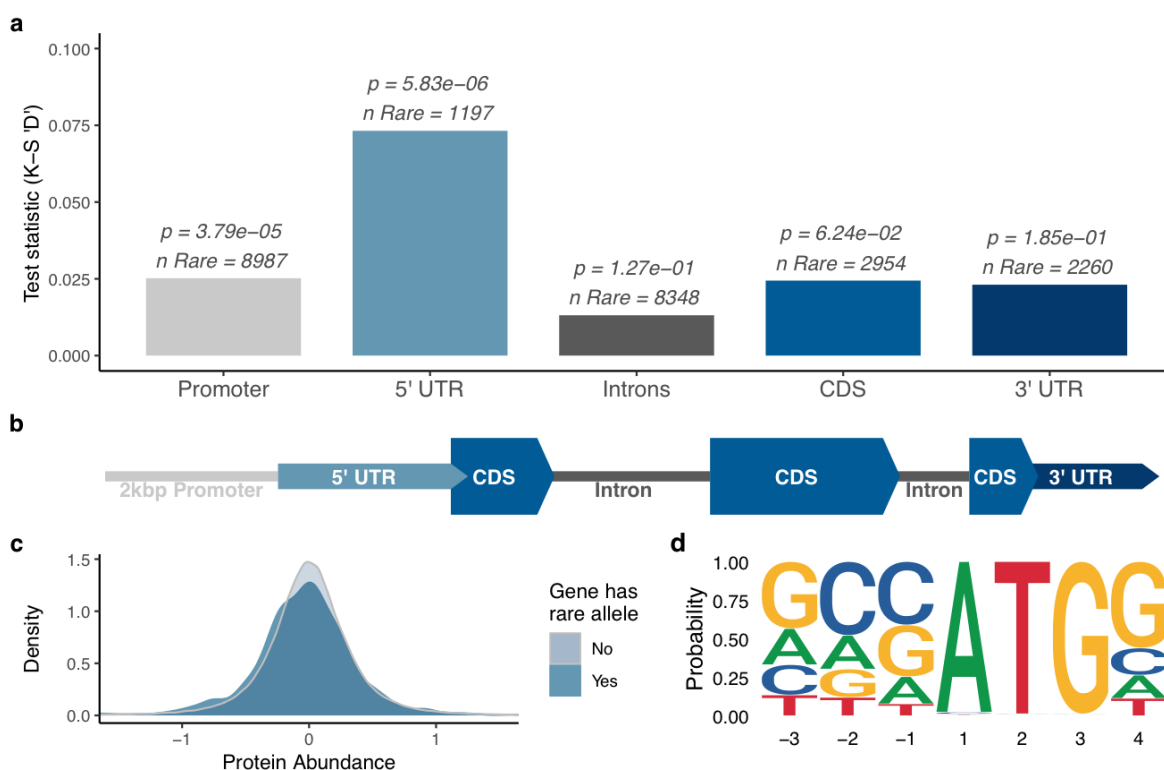

76 **Figure 1: Individuals with rare alleles have more variable protein abundance.** (a) Individuals with at least one rare allele  
77 (MAF < 0.02) in each genic region (b; generic gene) were compared to individuals with no rare alleles in any of the genic  
78 regions. The Kolmogorov-Smirnov (K-S) test statistic 'D' indicates differences in the distribution of protein abundance  
79 between individuals with and without rare alleles. Rare alleles in the 5' UTR are significantly associated with dysregulated  
80 protein abundance (two sided K-S test, number of observations without rare allele = 184,668). (c) Distribution of protein  
81 abundance for individuals with rare alleles in the 5' UTR (blue), compared to individuals without rare alleles (light blue). (d)  
82 Empirical maize Kozak sequence derived from the predicted start codon region of annotated gene models in v5 of the B73  
83 genome.

84 The 5' UTR can contribute to post-transcriptional regulation of gene expression, and machine learning  
85 models have been successful at predicting protein abundance from sequence. However, application of  
86 previously developed machine learning models<sup>28,30</sup> proved unable to predict allelic differences in protein  
87 abundance from 5' UTR and transcript sequence in four maize inbreds. Instead, we turned to evaluating  
88 mechanisms by which these observed rare variants might be disrupting translation.

89 Secondary structure and high GC content of the 5' UTR can affect translation efficiency, presumably by  
90 the formation of secondary structure that obstructs scanning of the 43S pre-initiation complex and  
91 completion of initiation<sup>25,26,28,31</sup>, a mechanism which can regulate gene expression response to  
92 environmental conditions<sup>32</sup>. However, single base-pair substitutions (the focus of this study) do not  
93 cause appreciable changes in secondary structure or GC content of the 5' UTR. Upstream open reading  
94 frames (uORFs) located in the 5' UTR and preceding the main open reading frame (mORF) also  
95 contribute to post-transcriptional gene regulation, generally by reducing translation of the mORF<sup>26,28,33</sup>.  
96 We hypothesized that rare alleles can disrupt existing uORF start codons or create start codons that  
97 generate novel uORFs, thereby decreasing or increasing (respectively) uORF translation and ultimately  
98 altering translation of the mORF (Figure 2a,b). Based on this hypothesis, and under the assumption that  
99 there is an inverse relationship between uORF and mORF translation, we predicted that 1) rare alleles  
100 that weaken existing uORF start codons will be associated with greater mORF protein abundance  
101 (Figure 2a), and 2) rare alleles that cause new or strengthen existing uORF start codons will be  
102 associated with lower mORF protein abundance (Figure 2b).

103 To test the first prediction, we identified uORFs that show evidence of translation based on ribosome  
104 profiling data<sup>34</sup>, then searched for rare alleles within or near the start codons of those uORFs. A score  
105 was assigned to the common and rare alleles based on similarity of their surrounding sequence to the  
106 maize Kozak sequence (Figure 1d)<sup>35</sup>, and variants with rare alleles that weaken the Kozak sequence  
107 were labelled as 'derepressive variants', based on hypothesized effect of the rare allele on mORF protein  
108 abundance (Supplemental Data 3). Derepressive variants were compared to rare alleles anywhere else in  
109 the 5' UTRs of genes with translated uORFs, including within uORFs themselves but excluding the start  
110 codons of translated uORFs. This comparison revealed that derepressive variants are associated with  
111 31% greater mORF protein abundance than rare alleles elsewhere in the 5' UTR of genes with translated  
112 uORFs (Figure 2c;  $p=8.6e-03$ , two-sided Mann-Whitney test). We also studied the difference in protein  
113 abundance between individuals with the common and rare derepressive alleles. In 10 out of 14 cases, the  
114 rare derepressive alleles were associated with increased mORF protein abundance relative to the  
115 common allele (Figure 2e).

**a**

Reference allele mRNA:

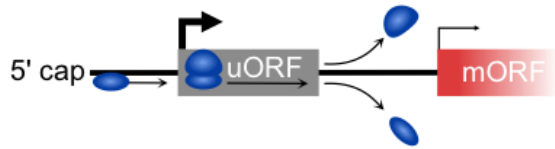

**|**: Derepressive allele

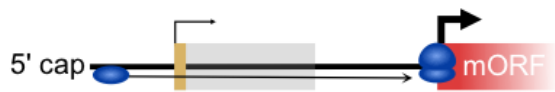

**b**

Reference allele mRNA:

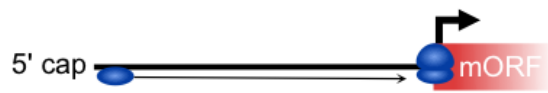

**|**: Repressive allele

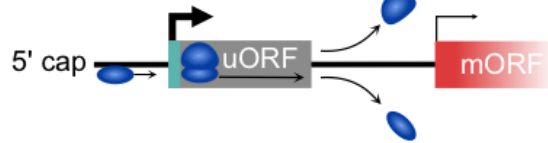

**c**

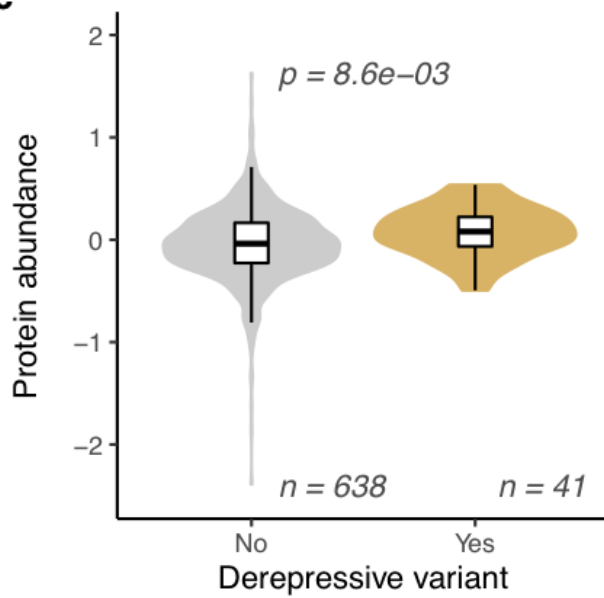

**d**

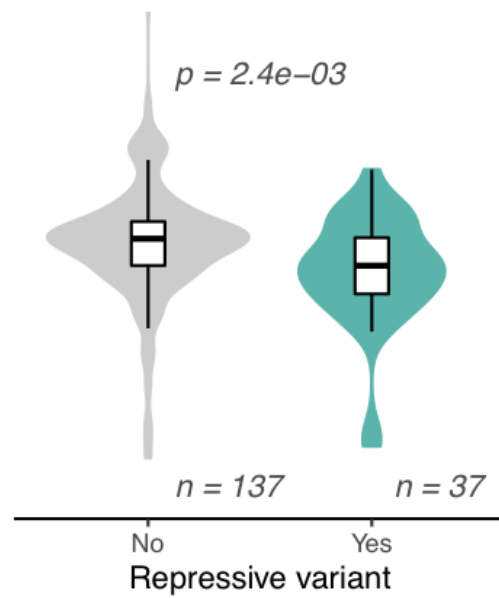

**e**

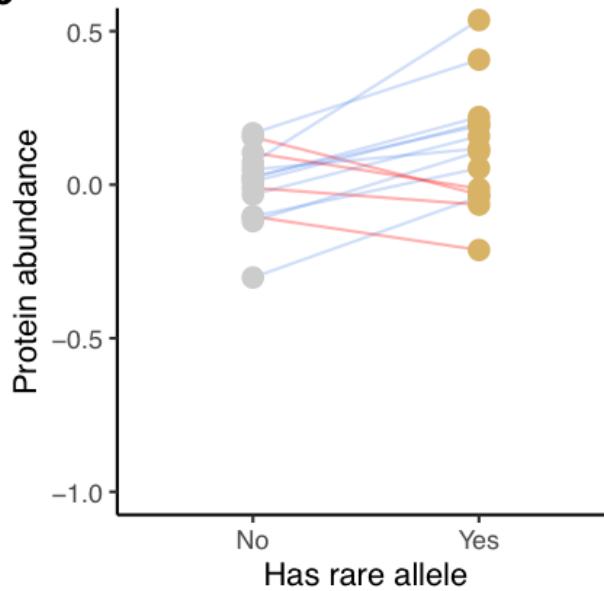

**f**

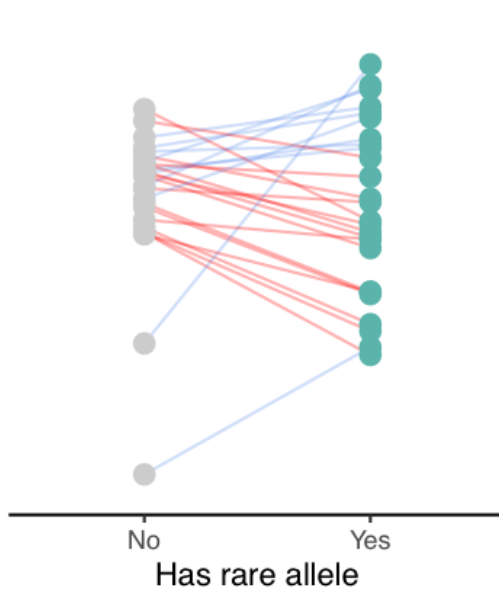

116 **Figure 2: Rare variants that alter upstream open reading frame start codons are associated with altered protein**  
117 **abundance of the main open reading frame.** (a) Rare SNP alleles which disrupt or weaken the start codon of an existing  
118 translated upstream open reading frame (uORF) are associated with derepression of the main open reading frame (mORF),  
119 whereas (b) rare alleles which cause a new start codon or strengthen an existing start codon in the 5' UTR are associated with  
120 repression of the mORF. c) and d) show the effects of derepressive and repressive rare alleles, compared to the effects of  
121 other rare alleles in similar contexts (two sided Mann-Whitney test; boxplots show median, first and third quartiles, and  
122 whiskers extend no further than 1.5 times the interquartile range). e) and f) compare protein abundance between individuals  
123 with rare and common alleles on a per-gene basis. Individuals with rare alleles of derepressive variants often have greater  
124 protein abundance than individuals with the common allele. Individuals with rare alleles at repressive variants often have  
125 lower protein abundance than individuals with the common allele. Each pair of points connected by a line represents a single  
126 gene; the points are the median protein abundance for individuals with either the rare or common SNP allele; connecting  
127 lines are colored by whether the rare allele increases (blue) or decreases (red) protein abundance.

128 To test the second prediction, we performed similar analyses to those described above but focused on  
129 genes with either no annotated uORFs, or with annotated uORFs that did not show any evidence of  
130 translation<sup>34</sup>. We searched for rare alleles that increased their surrounding sequence's similarity to the  
131 maize Kozak sequence<sup>35</sup>, and labelled them as 'repressive variants', based on their hypothesized effect  
132 on mORF protein abundance (Supplemental Data 3). We compared repressive variants to rare alleles  
133 which are located in genes with no annotated or translated uORFs, but decrease the surrounding  
134 sequence's similarity to the Kozak motif. Repressive variants are associated with a 45% decrease in  
135 protein abundance of the corresponding mORF (Figure 2d;  $p=2.4e-03$ , two-sided Mann-Whitney test).  
136 Comparing individuals with rare alleles at repressive variants to individuals with common alleles  
137 revealed 17 out of 26 rare alleles were associated with decreased mORF protein abundance (Figure 2f).

138 Given that rare, putatively deleterious variants appear to dysregulate mORF protein abundance by  
139 altering start codons of uORFs, we wondered whether historical mutations with similar mechanisms may  
140 have conferred adaptive advantage and risen to a higher allele frequency via positive selection. We  
141 identified common ( $MAF > 0.1$ ) repressive and derepressive variants using the same criteria described  
142 above (Supplemental Data 4), and tested their association with mORF protein abundance. We found an  
143 enrichment of significant associations between repressive or derepressive variants and mORF protein  
144 abundance (Figure 3a; one-sided Mann-Whitney test). We reasoned that if these common alleles are  
145 adaptive, they may also affect metabolic or physical phenotypes. Indeed, derepressive variants show  
146 greater than 16% enrichment for GWAS hits over all common variants in 5' UTRs, with > 77% of  
147 derepressive variants associated with at least one phenotype. On the other hand, repressive variants show  
148 a statistically insignificant 5% enrichment (Figure 3b; two-sided binomial test; Supplemental Data 5).  
149 The enrichment of GWAS hits for metabolic phenotypes is particularly notable because uORFs have  
150 been implicated in metabolite based regulation involving the translating ribosome<sup>36,37</sup>. Derepressive  
151 variants show stronger association with protein abundance and greater enrichment for GWAS hits than  
152 repressive variants, possibly because reduced translation of the mORF may be under strong negative  
153 selection<sup>38</sup>, or because SNPs are more likely to disrupt existing uORFs than to create new translated  
154 uORFs<sup>39</sup>.

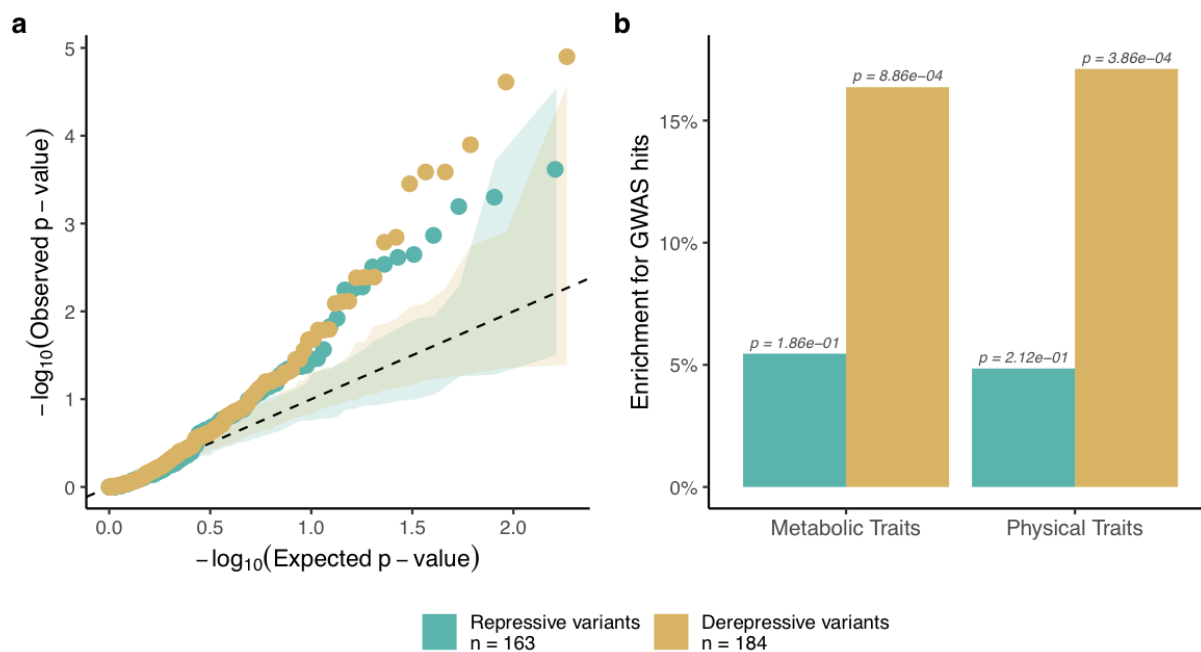

155 **Figure 3: Common variants that alter upstream open reading frame start codons show evidence of adaptive function.**

156 a) Common variants (MAF > 0.1) show significant association with main open reading frame (mORF) protein abundance  
157 based on one-sided Mann-Whitney test for increased (derepressive variants) or decreased (repressive variants) mORF protein  
158 abundance. Shaded areas show distribution of p-values over 100 permutation tests; dashed line marks a one-to-one  
159 relationship. b) Common derepressive variants show a significantly increased number of GWAS hits relative to all common  
160 SNPs in 5' UTRs (two-sided binomial test).

161 None of the derepressive or repressive variants we identified overlap with genes that have conserved  
162 peptide uORFs (CPuORFs) across angiosperms<sup>40</sup>. This is possibly because the strong conservation of  
163 CPuORFs means any new mutations are subject to strong negative selection. Studies identifying  
164 CPuORFs have also been largely focused on dicots. However, many of the uORFs containing  
165 derepressive and repressive variants that we identified are conserved between members of the  
166 Andropogoneae tribe<sup>41</sup>, although they are not significantly more or less conserved than all other uORFs  
167 (Supplemental Figure 3).

168 All results up to this point have been based on genes that have protein abundance data. We expanded our  
169 scope to all annotated genes in B73 and identified variants that may have repressive or derepressive  
170 function (Supplemental Data 6). Genes with derepressive variants were enriched for biological process  
171 gene ontology terms related to metabolic and biosynthetic processes (Supplemental Table 7), consistent  
172 with evidence that uORFs contribute to regulation of metabolic pathways in plants<sup>42,43</sup>. We identified a  
173 potential derepressive variant in the 5' UTR of an adenosylmethionine decarboxylase,  
174 Zm00001eb184470, the ortholog of which has been shown to be regulated by uORFs in *Arabidopsis*  
175 *thaliana*<sup>44</sup>.

176 Beyond plants, it may be the case that certain protein families are regulated by uORFs across  
177 eukaryotes. We found derepressive variants in the uORFs of Zm00001eb252410 & Zm00001eb136490,  
178 which both encode proteins from the heat shock protein 70 family, a member of which has been shown  
179 to be regulated by uORFs in humans<sup>45</sup>. Another derepressive variant is in the uORF of

Zm00001eb070400, which is a multidrug resistance-associated protein (ABC transporter C family member 2), also shown to be regulated by uORFs in humans<sup>46</sup>.

These results demonstrate that rare alleles have dysregulatory effects on the proteome. We have also shown that uORF translation contributes to allelic differences in mORF protein abundance between individuals. Not only do these effects show up at the protein level, but variants in uORFs are enriched for GWAS hits of metabolic and physiological traits. Because these effects relate to fundamental aspects of the translational machinery, we anticipate that these findings will extend beyond maize and be applicable in most eukaryotes. These findings can be used to engineer or predict variation in protein regulation and can potentially be applied to address problems in synthetic biology, genome editing, crop improvement, and human disease.



## Materials & Methods

### *Proteomic datasets*

Two distinct proteomic datasets were used in this study. The first consisted of four inbred lines (B73, Mo17, CML103, and P39) for which genome assemblies are publicly available. These were used for analyses in which accurate genomic sequence or biological replication was needed. The second dataset was generated by Jiang and colleagues<sup>2</sup>, which consists of 98 diverse inbred lines. Protein abundance data for these lines was determined by using B73 as the reference for aligning peptides to the proteome. These data were used for analyses requiring a larger sample size and SNP sets called against a common reference genome.

### *Replicated proteomics on four diverse inbreds*

The plants were grown using 3:1 Metromix 900 (SunGro)/Turface MVP (Profile Products) in the greenhouse under a 16-hr light/8-hr dark photoperiod and 27 °C/ 22 °C day/ night temperatures. Third and fourth leaves of two weeks old plants were collected separately, flash frozen and stored at -80 °C. Sample preparation and mass spectrometry analysis was performed as described by McLoughlin and collaborators<sup>47</sup>. Each genotype was analyzed with five biological and three technical replicates. Raw mass spectrometry data were analyzed against the B73 v5 proteome<sup>48</sup> with Proteome Discoverer (version 2.0.0.802; Thermo Fisher Scientific). Peptides were assigned by SEQUEST HT, allowing 1 missed tryptic cleavage, a precursor mass tolerance of 10 ppm and a fragment mass tolerance of 0.02 Da. Carbamidomethylation of cysteines and oxidation of methionine were used as static and dynamic modifications, respectively. Only peptides with FDRs of 0.01 (high confidence) were used for data analysis.

### *Heritability calculations*

We fit each peptide with the model  $y_{ij} = g_i + e_{ij}$  where  $y_{ij}$  was the protein abundance of peptide  $i$  in inbred  $j$ ,  $g_i$  is the genetic effect of inbred  $i$ , and  $e_{ij}$  is the residual for peptide  $i$  in inbred  $j$ . Both terms  $g$  and  $e$  were random effects, with variances  $\sigma_g^2$  and  $\sigma_e^2$  respectively. Heritability was calculated as  $H^2 = \hat{\sigma}_g^2 / (\hat{\sigma}_g^2 + \hat{\sigma}_e^2)$ .

### *Protein abundance prediction*

We attempted to predict peptide abundance, using several sequence-based models that predict protein or mRNA abundance. The first model we tested was described by Washburn and Wang<sup>30</sup>, who developed it to predict which of two orthologous genes in *Zea mays* and *Sorghum bicolor* had higher mRNA expression levels. We used the same inputs, namely 1500bp of DNA sequence from each of the

promoter and terminator regions of each gene, and attempted to predict which of two inbred lines had higher peptide abundance.

The second model we tested was published by Cuperus and colleagues<sup>28</sup>, who trained their model on a library of random *Saccharomyces cerevisiae* 5' UTRs and corresponding protein abundances. We used their pretrained model to try to predict peptide abundance in maize. Because the peptide abundances in our dataset cannot be compared between genes, we instead compared the log<sub>10</sub>-ratio of observed peptide abundances to the log<sub>10</sub>-ratio of predicted peptide abundances for each pairwise comparison between inbreds at each peptide in our dataset.

The third model we tested was based on the observation that codon bias can be predictive of protein abundance<sup>49-51</sup>. We trained a multiple linear regression model to predict the log-ratio of peptide abundance between two inbreds, using as explanatory variables the differences in codon counts between alleles of genes encoding the same peptide.

### *Uplifting Jiang proteomic data*

The proteomic data generated by Jiang and colleagues<sup>2</sup> was uplifted to version 5 of the B73 proteome<sup>48</sup>. The Uniprot IDs in the published data were used to obtain protein sequences, which were translated to v5 using blastp<sup>52</sup>. Proteins with a match in the v5 proteome that had >90% identity and >90% coverage (2523 out of 2750) were kept. Similar to the four-inbred experiment described above, the protein abundances reported by Jiang and colleagues were normalized by calculating the log<sub>10</sub>-ratio against B73, in order to facilitate comparisons between genes.

### *Calling HapMap SNPs on Jiang inbreds*

The maize HapMap3.2.1<sup>23</sup> SNP data were uplifted to B73 v5 coordinates using CrossMap<sup>53</sup>. Whole genome sequencing of 95 maize inbreds<sup>2</sup> was used to call SNPs at the same v5 positions and using the same methods as HapMap3.2.1<sup>23</sup>.

### *Effects of rare variants on protein abundance*

To study the relationship between rare, putatively deleterious variants and protein abundance, we classified SNPs as rare if they had a minor allele frequency (MAF) < 0.02 in the maize HapMap 3.2.1 panel, which contains over 1,200 diverse maize varieties and wild relatives, and represents an independent dataset from the Jiang inbred lines for defining MAF<sup>23</sup>.

Variants were categorized based on overlap with five annotated features: promoters (2,000bp upstream of the TSS), 5' UTRs, 3' UTRs, CDS, and introns. SNPs were categorized using the GenomicFeatures<sup>54</sup> package in R<sup>55</sup>, based on the Zm00001eb.1 annotation of B73<sup>48</sup>. Each combination of gene, feature, and inbred was given a binary classification for whether or not it contained a rare (MAF < 0.02) SNP allele.

Within each feature, the relative protein abundance of all gene/inbred combinations that did contain a rare allele was compared to a null consisting of protein abundances in gene/inbred combinations that did not have rare variants in any of the five features. Distributions of protein abundance between the rare-variant and null categories were statistically compared by the Kolmogorov–Smirnov test<sup>56,57</sup>.

### *Identifying translated upstream open reading frames*

Two biological samples of riboseq data generated by Lei and colleagues<sup>34</sup> on non-stressed B73 seedlings were obtained from NCBI SRA accessions SRX845439 and SRX845455. Riboseq data consist of sequenced fragments of mRNA which are bound by ribosomes and therefore assumed to be undergoing translation. Cutadapt<sup>58</sup> version 1.18 was run using the parameters ‘-a CTGTAGGCACCATCAAT -m 20’ to remove adapters and discard any reads shorter than 20bp. Reads were mapped against version 5 of the B73 genome using hisat2<sup>59</sup> version 2.2.1 with default parameters except for ‘--trim5 1’ to remove the first bp from each read, which the original authors describe as frequently representing an untemplated addition during reverse transcription<sup>34</sup>. The alignments were sorted and indexed with samtools<sup>60</sup> version 1.11, and reads that mapped to more than one location in the genome were discarded.

uORFs were computationally identified using the R<sup>55</sup> package ORFik<sup>61</sup>. uORFs were identified using the pattern (ATG|TTG|CTG-3n-TAA|TAG|TGA), since translated uORFs can initiate on non-canonical start codons<sup>62–64</sup>. Any uORFs that overlapped with annotated coding sequences were discarded, and the remaining uORFs were used as targets for read counting.

Reads overlapping computationally identified uORFs were counted by htseq<sup>65</sup> version 0.11.3 using htseq-count with the argument ‘--nonunique all’ so that reads were not discarded if they mapped to multiple overlapping uORFs or uORFs on different annotated transcripts. The log(FPKM + 1) values for the two biological samples were correlated,  $r=0.99$  for CDS,  $r=0.75$  for uORFs. The lower correlation for uORFs was primarily due to uORFs with reads in one sample but not the other; discounting those, the correlation of log(FPKM) between samples was  $r=0.92$ . These correlations were high enough that read counts from both samples were pooled and FPKM calculated on the pooled counts.

Translated uORFs were defined as computationally identified uORFs that had FPKM > 20, FPKM < 1759, total length > 15bp, and total length < 333bp. These cutoffs were chosen based on the 5th and 95th percentiles of the distributions of FPKM and length across all uORFs, in order to exclude uORFs that may be in misannotated 5' UTRs or have an unusually high number of reads mapping to them. We were relatively lenient with calling translated uORFs because, as described below, we were more interested in identifying uORFs that may be translated than obtaining highly accurate quantification of translation.

### *Identifying variants that strengthen or weaken uORF start sequence*

An empirical maize Kozak sequence was determined by creating a position weight matrix of the sequence spanning -3 to +4 nucleotides relative to the translation start site of all annotated maize gene

models. Variants that weaken the Kozak of existing uORFs were identified by searching for variants that fell within the -3 to +4 range around the start of uORFs that show evidence of translation (described above). Two versions of the 7bp sequence around the start codon were created, one with each SNP allele, and they were scored for their similarity to the Kozak sequence using the R package Biostrings<sup>66</sup>. Variants that decreased the similarity to the Kozak sequence by 0.5 or more were classified as ‘derepressive’.

Identification of ‘repressive’ variants was performed similarly, but with rare variants that were in the 5’ UTR of genes with no annotated uORFs, or of genes with all annotated uORFs having FPKM < 5. Because an annotated uORF was not present in all instances, unlike in the preceding paragraph it was not obvious where to position the variants within the Kozak sequence. We calculated the similarity score against the Kozak with the variant site in all positions from -3 to +4, and chose the position with the highest score, reasoning that it represented the context that was closest to making a uORF start. We then substituted the alternate allele at the SNP site and compared the Kozak score, classifying variants that increased the score by > 0.25 as ‘repressive’.

#### *Identifying and testing adaptive variants*

Repressive and derepressive variants with MAF > 0.1 were identified by the same criteria as described above for rare alleles. One-sided Mann-Whitney tests were performed to test for increase or decrease of protein abundance associated with derepressive or repressive alleles, respectively. The results from these tests were compared to p-values from shuffling the genotypes and performing the same test 100 times for each variant.

#### *GWAS hit enrichment*

To determine the number of physiological and metabolic traits associated with SNPs within 5’ UTR regions, a graph database was used to store and query GWAS results with additional biological information in maize. Neo4j (v4.2.0) and Cypher (v4.2.0) were used as the graph database management system and querying language, respectively<sup>67</sup>. Results were obtained by interfacing with the database using the Neo4j driver, neo4r<sup>55,68</sup>. In total, 3,874 metabolite traits collected from the Goodman diversity panel<sup>69</sup> and 333 physiological traits collected from both the Goodman diversity and NAM panels<sup>70,71</sup> were used for association testing and SNP-trait relation queries (Khaipho-Burch et al., in prep). Significant counts were obtained by filtering associations between SNP and trait with p-value < 10e-5.

#### *Conservation among Andropogoneae*

Alignments between maize and five other grasses from the Andropogoneae tribe<sup>41</sup> were filtered to regions that overlap the annotated B73 5’ UTRs. uORFs, identified above, were classified based on whether at least one other species had alignments covering 90% or more of the uORF. uORFs with rare

221 or common repressive or derepressive variants were tested against all uORFs by two-sided chi-square  
222 test to see whether repressive and derepressive variants are associated with greater or lesser conservation  
223 among the Andropogoneae.

#### 224 *Gene ontology enrichment*

225 All repressive or derepressive variants and their cognate genes were identified genomewide using the  
226 criteria previously described. Gene ontology enrichment was performed using the R package topGO<sup>72</sup>.  
227 Fisher's test was used to compare Biological Process GO categories for genes with repressive or  
228 derepressive variants against all genes, using the GO annotations available at  
229 [https://download.maizegdb.org/Zm-B73-REFERENCE-NAM-5.0/Zm-B73-REFERENCE-NAM-5.0\\_Z](https://download.maizegdb.org/Zm-B73-REFERENCE-NAM-5.0/Zm-B73-REFERENCE-NAM-5.0_Zm00001eb.1.interproscan.tsv.gz)  
230 [m00001eb.1.interproscan.tsv.gz](https://download.maizegdb.org/Zm-B73-REFERENCE-NAM-5.0/Zm-B73-REFERENCE-NAM-5.0_Zm00001eb.1.interproscan.tsv.gz).

#### 231 **Data Availability**

232 SNP data can be found at [DOI to be made public on publication]. Raw proteomic data for four maize  
233 inbreds has been deposited on ProteomeXchange database under accession number [To be made public  
234 on publication]. All other data can be found in Supplemental materials, which will be made available on  
235 publication.

#### 236 **Code Availability**

237 Code for all analyses can be found at [https://bitbucket.org/bucklerlab/p\\_protein\\_diverse\\_maize/](https://bitbucket.org/bucklerlab/p_protein_diverse_maize/) (to be  
238 made public on publication).

#### 239 **Acknowledgements**

240 This material is based upon work supported by the NSF Postdoctoral Research Fellowship in Biology  
241 under Grant No. IOS-1906619, NSF Grant No. IOS-1840687, and the USDA-ARS.

#### 242 **References**

- 243 1. Buccitelli, C. & Selbach, M. mRNAs, proteins and the emerging principles of gene expression control. *Nat.*  
244 *Rev. Genet.* (2020) doi:10.1038/s41576-020-0258-4.
- 245 2. Jiang, L.-G. *et al.* Characterization of proteome variation during modern maize breeding. *Mol. Cell.*  
246 *Proteomics* **18**, 263–276 (2019).
- 247 3. Cenik, C. *et al.* Integrative analysis of RNA, translation, and protein levels reveals distinct regulatory  
248 variation across humans. *Genome Res.* **25**, 1610–1621 (2015).
- 249 4. Battle, A. *et al.* Impact of regulatory variation from RNA to protein. *Science* **347**, 664–667 (2015).
- 250 5. Wu, L. *et al.* Variation and genetic control of protein abundance in humans. *Nature* **499**, 79–82 (2013).
- 251 6. Chick, J. M. *et al.* Defining the consequences of genetic variation on a proteome-wide scale. *Nature* **534**,  
252 500–505 (2016).
- 253 7. Lynch, M. & Marinov, G. K. The bioenergetic costs of a gene. *Proc. Natl. Acad. Sci. U. S. A.* **112**,  
254 15690–15695 (2015).
- 255 8. Birchler, J. A. & Veitia, R. A. Gene balance hypothesis: connecting issues of dosage sensitivity across  
256 biological disciplines. *Proc. Natl. Acad. Sci. U. S. A.* **109**, 14746–14753 (2012).
- 257 9. Parts, L. *et al.* Heritability and genetic basis of protein level variation in an outbred population. *Genome Res.*  
258 **24**, 1363–1370 (2014).
- 259 10. Tenaillon, M. I. *et al.* Patterns of DNA sequence polymorphism along chromosome 1 of maize (*Zea mays*

- 260 ssp. mays L.). *Proc. Natl. Acad. Sci. U. S. A.* **98**, 9161–9166 (2001).
- 261 11. Buckler, E. S., Gaut, B. S. & McMullen, M. D. Molecular and functional diversity of maize. *Curr. Opin.*  
262 *Plant Biol.* **9**, 172–176 (2006).
- 263 12. Remington, D. L. *et al.* Structure of linkage disequilibrium and phenotypic associations in the maize genome.  
264 *Proc. Natl. Acad. Sci. U. S. A.* **98**, 11479–11484 (2001).
- 265 13. Gore, M. A. *et al.* A first-generation haplotype map of maize. *Science* **326**, 1115–1117 (2009).
- 266 14. Schadt, E. E. *et al.* Genetics of gene expression surveyed in maize, mouse and man. *Nature* **422**, 297–302  
267 (2003).
- 268 15. Keurentjes, J. J. B. *et al.* The genetics of plant metabolism. *Nat. Genet.* **38**, 842–849 (2006).
- 269 16. Ghazalpour, A. *et al.* Comparative analysis of proteome and transcriptome variation in mouse. *PLoS Genet.*  
270 **7**, e1001393 (2011).
- 271 17. Fu, J. *et al.* System-wide molecular evidence for phenotypic buffering in Arabidopsis. *Nat. Genet.* **41**,  
272 166–167 (2009).
- 273 18. Marouli, E. *et al.* Rare and low-frequency coding variants alter human adult height. *Nature* **542**, 186–190  
274 (2017).
- 275 19. Kimura, M. Rare variant alleles in the light of the neutral theory. *Mol. Biol. Evol.* **1**, 84–93 (1983).
- 276 20. Kryukov, G. V., Pennacchio, L. A. & Sunyaev, S. R. Most rare missense alleles are deleterious in humans:  
277 implications for complex disease and association studies. *Am. J. Hum. Genet.* **80**, 727–739 (2007).
- 278 21. Zhao, J. *et al.* A Burden of Rare Variants Associated with Extremes of Gene Expression in Human Peripheral  
279 Blood. *Am. J. Hum. Genet.* **98**, 299–309 (2016).
- 280 22. Kremling, K. A. G. *et al.* Dysregulation of expression correlates with rare-allele burden and fitness loss in  
281 maize. *Nature* **555**, 520–523 (2018).
- 282 23. Bukowski, R. *et al.* Construction of the third-generation *Zea mays* haplotype map. *Gigascience* **7**, 1–12  
283 (2018).
- 284 24. Ringnér, M. & Krogh, M. Folding free energies of 5'-UTRs impact post-transcriptional regulation on a  
285 genomic scale in yeast. *PLoS Comput. Biol.* **1**, e72 (2005).
- 286 25. Kudla, G., Murray, A. W., Tollervey, D. & Plotkin, J. B. Coding-sequence determinants of gene expression in  
287 *Escherichia coli*. *Science* **324**, 255–258 (2009).
- 288 26. Sample, P. J. *et al.* Human 5' UTR design and variant effect prediction from a massively parallel translation  
289 assay. *Nat. Biotechnol.* **37**, 803–809 (2019).
- 290 27. Morris, D. R. & Geballe, A. P. Upstream open reading frames as regulators of mRNA translation. *Mol. Cell.*  
291 *Biol.* **20**, 8635–8642 (2000).
- 292 28. Cuperus, J. T. *et al.* Deep learning of the regulatory grammar of yeast 5' untranslated regions from 500,000  
293 random sequences. *Genome Res.* **27**, 2015–2024 (2017).
- 294 29. Zhu, W. *et al.* Large-scale translome profiling annotates functional genome and reveals the key role of  
295 genic 3' untranslated regions in translomic variation in plants. *Plant Comm* **0**, (2021).
- 296 30. Washburn, J. D. *et al.* Evolutionarily informed deep learning methods for predicting relative transcript  
297 abundance from DNA sequence. *Proc. Natl. Acad. Sci. U. S. A.* **116**, 5542–5549 (2019).
- 298 31. Babendure, J. R., Babendure, J. L., Ding, J.-H. & Tsien, R. Y. Control of mammalian translation by mRNA  
299 structure near caps. *RNA* **12**, 851–861 (2006).
- 300 32. Chung, B. Y. W. *et al.* An RNA thermoswitch regulates daytime growth in Arabidopsis. *Nat. Plants* **6**,  
301 522–532 (2020).
- 302 33. Kawaguchi, R. & Bailey-Serres, J. Regulation of translational initiation in plants. *Curr. Opin. Plant Biol.* **5**,  
303 460–465 (2002).
- 304 34. Lei, L. *et al.* Ribosome profiling reveals dynamic translational landscape in maize seedlings under drought  
305 stress. *Plant J.* **84**, 1206–1218 (2015).
- 306 35. Kozak, M. The scanning model for translation: an update. *J. Cell Biol.* **108**, 229–241 (1989).
- 307 36. Hanfrey, C., Franceschetti, M., Mayer, M. J., Illingworth, C. & Michael, A. J. Abrogation of Upstream Open  
308 Reading Frame-mediated Translational Control of a Plant S-Adenosylmethionine Decarboxylase Results in  
309 Polyamine Disruption and Growth Perturbations\*. *J. Biol. Chem.* **277**, 44131–44139 (2002).
- 310 37. van der Horst, S., Filipovska, T., Hanson, J. & Smeekens, S. Metabolite Control of Translation by Conserved  
311 Peptide uORFs: The Ribosome as a Metabolite Multisensor. *Plant Physiol.* **182**, 110–122 (2020).
- 312 38. MacArthur, D. G. *et al.* A systematic survey of loss-of-function variants in human protein-coding genes.  
313 *Science* **335**, 823–828 (2012).

- 314 39. Monroe, J. G., McKay, J. K., Weigel, D. & Flood, P. J. The population genomics of adaptive loss of function.  
315 *Heredity* **126**, 383–395 (2021).
- 316 40. van der Horst, S., Snel, B., Hanson, J. & Smeekens, S. Novel pipeline identifies new upstream ORFs and  
317 non-AUG initiating main ORFs with conserved amino acid sequences in the 5' leader of mRNAs in  
318 *Arabidopsis thaliana*. *RNA* **25**, 292–304 (2019).
- 319 41. Song, B. *et al.* Constrained non-coding sequence provides insights into regulatory elements and loss of gene  
320 expression in maize. *bioRxiv* 2020.07.11.192575 (2020) doi:10.1101/2020.07.11.192575.
- 321 42. Carbonell, J. & Blázquez, M. A. Regulatory mechanisms of polyamine biosynthesis in plants. *Genes*  
322 *Genomics* **31**, 107–118 (2009).
- 323 43. von Arnim, A. G., Jia, Q. & Vaughn, J. N. Regulation of plant translation by upstream open reading frames.  
324 *Plant Sci.* **214**, 1–12 (2014).
- 325 44. Hanfrey, C. *et al.* A Dual Upstream Open Reading Frame-based Autoregulatory Circuit Controlling  
326 Polyamine-responsive Translation\*. *J. Biol. Chem.* **280**, 39229–39237 (2005).
- 327 45. Starck, S. R. *et al.* Translation from the 5' untranslated region shapes the integrated stress response. *Science*  
328 **351**, aad3867 (2016).
- 329 46. Zhang, Y., Zhao, T., Li, W. & Vore, M. The 5'-untranslated region of multidrug resistance associated protein  
330 2 (MRP2; ABCC2) regulates downstream open reading frame expression through translational regulation.  
331 *Mol. Pharmacol.* **77**, 237–246 (2010).
- 332 47. McLoughlin, F. *et al.* Maize multi-omics reveal roles for autophagic recycling in proteome remodelling and  
333 lipid turnover. *Nat Plants* **4**, 1056–1070 (2018).
- 334 48. Hufford, M. B. *et al.* De novo assembly, annotation, and comparative analysis of 26 diverse maize genomes.  
335 *Cold Spring Harbor Laboratory* 2021.01.14.426684 (2021) doi:10.1101/2021.01.14.426684.
- 336 49. Jeacock, L., Faria, J. & Horn, D. Codon usage bias controls mRNA and protein abundance in  
337 trypanosomatids. *Elife* **7**, (2018).
- 338 50. Tuller, T., Waldman, Y. Y., Kupiec, M. & Ruppin, E. Translation efficiency is determined by both codon bias  
339 and folding energy. *Proc. Natl. Acad. Sci. U. S. A.* **107**, 3645–3650 (2010).
- 340 51. Klumpp, S., Dong, J. & Hwa, T. On ribosome load, codon bias and protein abundance. *PLoS One* **7**, e48542  
341 (2012).
- 342 52. Altschul, S. F., Gish, W., Miller, W., Myers, E. W. & Lipman, D. J. Basic local alignment search tool. *J. Mol.*  
343 *Biol.* **215**, 403–410 (1990).
- 344 53. Zhao, H. *et al.* CrossMap: a versatile tool for coordinate conversion between genome assemblies.  
345 *Bioinformatics* **30**, 1006–1007 (2014).
- 346 54. Lawrence, M. *et al.* Software for computing and annotating genomic ranges. *PLoS Comput. Biol.* **9**,  
347 e1003118 (2013).
- 348 55. R Core Team. R: A Language and Environment for Statistical Computing. (2018).
- 349 56. Kolmogorov, A. Sulla determinazione empirica di una legge di distribuzione. *Inst. Ital. Attuari, Giorn.* **4**,  
350 83–91 (1933).
- 351 57. Smirnov, N. Table for Estimating the Goodness of Fit of Empirical Distributions. *Ann. Math. Stat.* **19**,  
352 279–281 (1948).
- 353 58. Martin, M. Cutadapt removes adapter sequences from high-throughput sequencing reads. *EMBnet.journal*  
354 **17**, 10–12 (2011).
- 355 59. Kim, D., Paggi, J. M., Park, C., Bennett, C. & Salzberg, S. L. Graph-based genome alignment and  
356 genotyping with HISAT2 and HISAT-genotype. *Nat. Biotechnol.* **37**, 907–915 (2019).
- 357 60. Li, H. *et al.* The Sequence Alignment/Map format and SAMtools. *Bioinformatics* **25**, 2078–2079 (2009).
- 358 61. Tjeldnes, H. *et al.* ORFik: a comprehensive R toolkit for the analysis of translation. *Cold Spring Harbor*  
359 *Laboratory* 2021.01.16.426936 (2021) doi:10.1101/2021.01.16.426936.
- 360 62. Zhang, H., Wang, Y. & Lu, J. Function and Evolution of Upstream ORFs in Eukaryotes. *Trends Biochem.*  
361 *Sci.* **44**, 782–794 (2019).
- 362 63. Kearse, M. G. & Wilusz, J. E. Non-AUG translation: a new start for protein synthesis in eukaryotes. *Genes*  
363 *Dev.* **31**, 1717–1731 (2017).
- 364 64. Li, Y.-R. & Liu, M.-J. Prevalence of alternative AUG and non-AUG translation initiators and their regulatory  
365 effects across plants. *Genome Res.* **30**, 1418–1433 (2020).
- 366 65. Anders, S., Pyl, P. T. & Huber, W. HTSeq—a Python framework to work with high-throughput sequencing  
367 data. *Bioinformatics* **31**, 166–169 (2014).

- 368 66. Pagès, H., Aboyoun, P., Gentleman, R. & DebRoy, S. Biostrings: Efficient manipulation of biological strings.  
369 (2020).
- 370 67. Platform, N. G. The Leader in Graph Databases. *Neo4j Graph Database Platf.*
- 371 68. Fay, C. neo4r: A ‘Neo4J Driver’. (2019).
- 372 69. Flint-Garcia, S. A. *et al.* Maize association population: a high-resolution platform for quantitative trait locus  
373 dissection: High-resolution maize association population. *Plant J.* **44**, 1054–1064 (2005).
- 374 70. Yu, J., Holland, J. B., McMullen, M. D. & Buckler, E. S. Genetic design and statistical power of nested  
375 association mapping in maize. *Genetics* **178**, 539–551 (2008).
- 376 71. Gage, J. L., Monier, B., Giri, A. & Buckler, E. S. Ten Years of the maize Nested Association Mapping  
377 Population: Impact, Limitations, and Future Directions. *Plant Cell* (2020) doi:10.1105/tpc.19.00951.
- 378 72. Alexa, A. & Rahnenfuhrer, J. topGO: Enrichment Analysis for Gene Ontology. (2018).



## 379 Supplemental Material

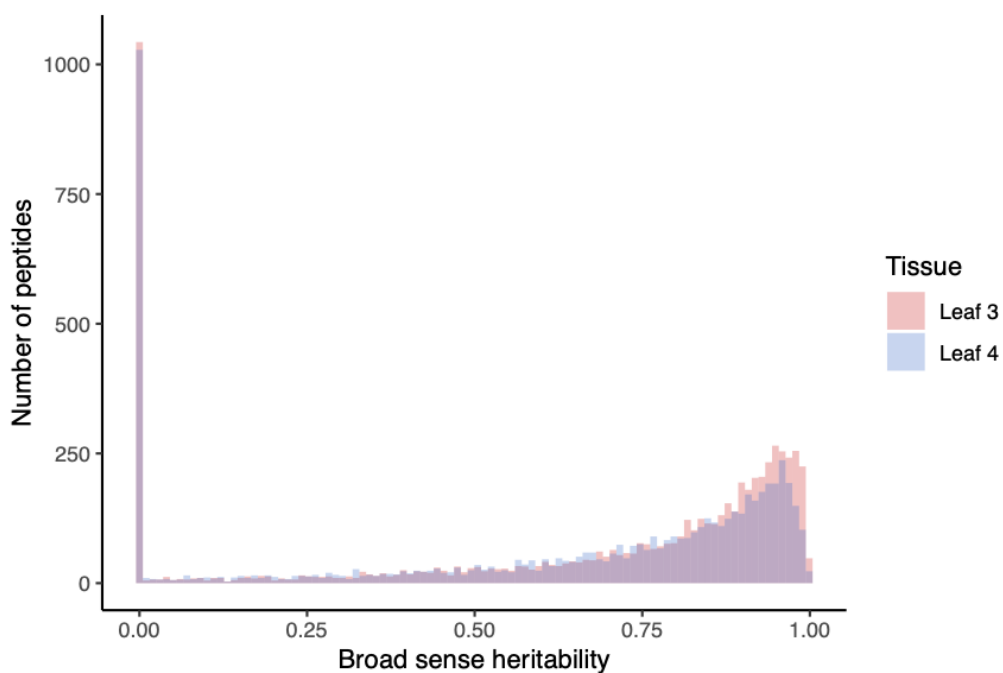

380 **Supplemental Figure 1:** [figs/supplemental/peptide\\_heritability.pdf](figs/supplemental/peptide_heritability.pdf) Broad-sense heritability estimates for peptides  
381 measured in four diverse inbred maize lines. Many peptides with zero heritability appear to be constitutively expressed at a  
382 constant level across individuals (ie, no genetic variance).

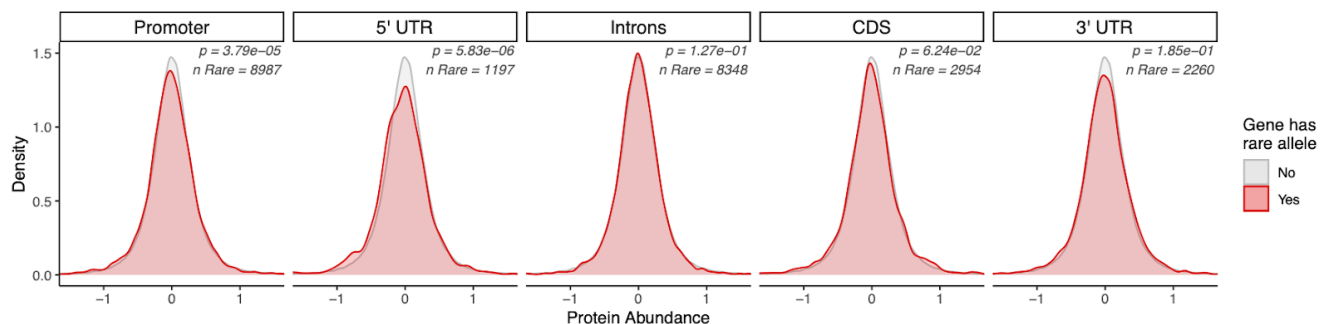

383 **Supplemental Figure 2:** [figs/supplemental/rare\\_alleles\\_genic\\_features\\_distributions.pdf](figs/supplemental/rare_alleles_genic_features_distributions.pdf). Distribution of protein  
384 abundance for individuals with rare alleles in each given region of a gene (red), compared to individuals with no rare alleles  
385 in a gene (gray). A two sided Kolmogorov-Smirnov test for differences between two distributions was used to estimate  
386 significance.

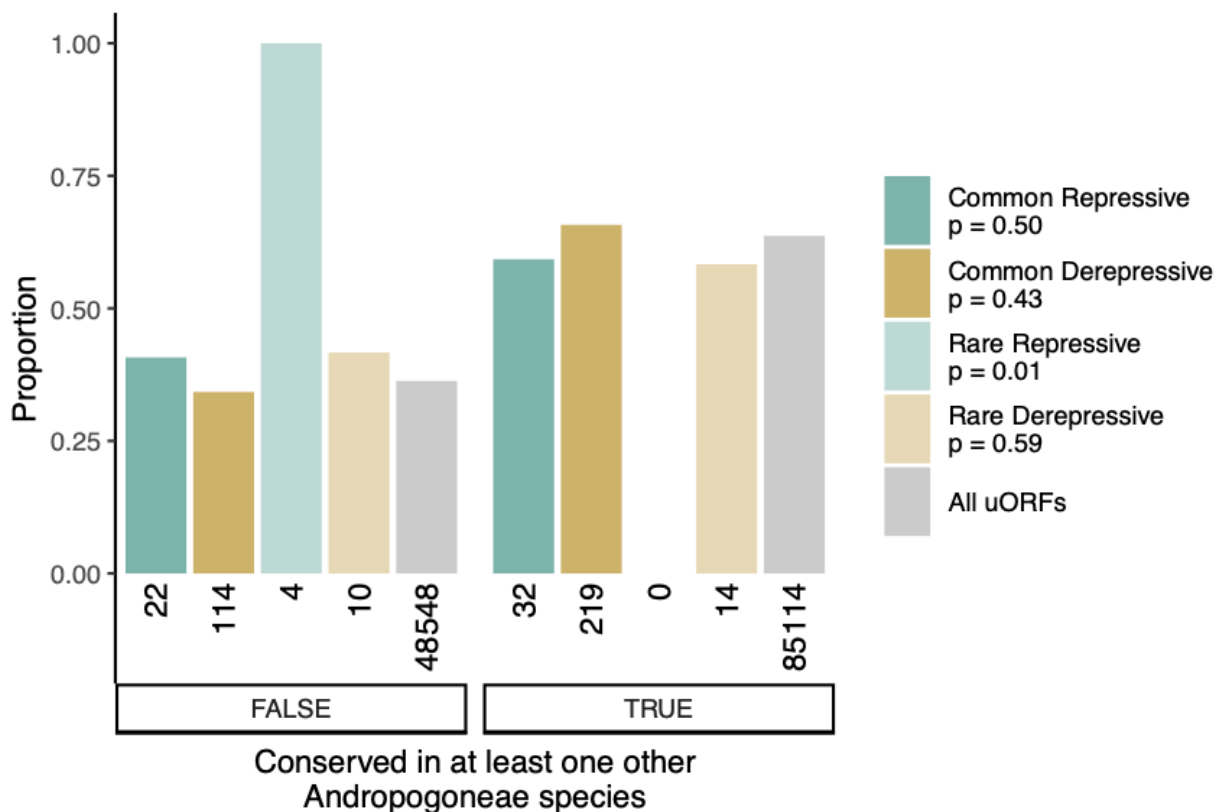

387 **Supplemental Figure 3: [figs/supplemental/conserved\\_uORFs.pdf](#)** Conservation of uORFs within five additional species  
388 from the Andropogoneae tribe. Numbers below bars are the quantity of uORFs in each category. The number of derepressive  
389 uORFs in this analysis is greater than the total number of derepressive uORF variants because for this analysis variants can  
390 be within more than one uORF. The number of repressive uORFs in this figure is lower than the total number of repressive  
391 uORF variants because not all variants were within annotated uORFs and therefore could not be scored for sequence  
392 conservation.
